# Supplementary material for: Genome-wide analysis of basic helix-loop-helix superfamily members in peach
Source: PLoS One. 2018 Apr 16;13(4):e0195974. doi: 10.1371/journal.pone.0195974 (PMC5901983; doi:10.1371/journal.pone.0195974)
Supplement: S3 Table — (XLSX) [file pone.0195974.s003.xlsx]

## Sheet: S3 Table
	motif 1 (Red block)				motif 2 (Blue block)				motif 3 (Green block)
ID	Start of motif 1	E-value	Sequence	End of motif 1	Start of motif 2	E-value	Sequence	End of motif 2	Start of motif 3	E-value	Sequence	End of motif 3
Prupe.5G183200.1	157	1.59e-26	ATDSHSLAERARREKISERMKLLQDLVPG	185	187	1.05e-20	NKVIGKALVLDEIINYIQSLQHQVEFLSM	215
Prupe.1G263800.1	168	1.85e-27	ATDSHSLAERARREKISERMKILQDLVPG	196	198	2.46e-21	NKVIGKALVLDEIINYIQSLQRQVEFLSM	226
Prupe.8G193900.1	394	1.51e-27	ATDSHSLAERVRREKISERMKLLQDLVPG	422	424	2.81e-23	NKVTGKALMLDEIINYVQSLQRQVEFLSM	452
Prupe.1G173300.1	375	2.27e-27	ATDSHSLAERVRREKISERMKFLQDLVPG	403	405	9.32e-24	NKVTGKAVMLDEIINYVQSLQRQVEFLSM	433
Prupe.1G297200.1	375	1.6e-25	ATNSHSLAERVRREKISERMKFLQDLVPG	403	407	2.29e-22	VVVTGKAVMLDEIINYVQSLQRQVEFLSM	435
Prupe.1G418500.1	272	1.6e-25	ATNSHSLAERVRREKISERMRLLQELVPG	300	302	2.06e-23	NKITGKAVMLDEIINYVQSLQQQVEFLSM	330
Prupe.7G070200.1	193	1.59e-26	ATDNHSLAERARREKINARMKLLQELVPG	221	223	1.59e-18	NKISGTALVLDEIINHVQSLQRQVEFLSM	251
Prupe.5G144400.1	171	5.26e-28	ATDSHSLAERVRREKISERMKMLQRLVPG	199	201	1.71e-22	DKVTGRAVMLDEIINYVQSLQNQVEFLSM	229
Prupe.1G217700.1	50	2.65e-25	ATDSHSLAERARREKINVRMKLLQSLVPG	78	80	4.35e-16	DQINGKAHALDEIIKYVQLLQNQVECLAA	108
Prupe.8G095700.1	247	2.78e-27	ATDSHSLAERVRREKISERMKYLQDLVPG	275	277	1.71e-22	NKITGKAGMLDEIINYVQSLQRQVEFLSM	305
Prupe.1G313200.1	114	1.74e-28	ATDSHSLAERVRREKINERLRCLQNLVPG	142	144	6.54e-18	YKTMGMAVMLDVVISYVQSLQNQIEFLSM	172
Prupe.5G222200.1	172	1.33e-24	ATDSHSLAERVRRGKINERLRCLQNIVPG	200	202	7.11e-21	SKTMGMAVMLDEIINYVQSLQNQVEFLSM	230
Prupe.7G191100.1	280	6.75e-26	ATDPHSIAERLRREKIAERMKNLQELVPN	308	309	1.27e-25	SNRTDKASMLDEIIEYVKFLQLQIKVLSM	337
Prupe.7G260800.1	276	1.85e-27	ATDPHSIAERLRRERIAERMKALQELVPN	304	305	8.15e-28	ANKTDKASMLDEIIDYVKFLQLQVKVLSM	333
Prupe.6G343400.1	187	1.9e-25	ATDPHSIAERLRRERIAERMKALQELVPS	215	216	6.76e-24	CNKTDRAAMLDEIVDYVKFLRLQVKVLSM	244
Prupe.8G232600.1	143	1.81e-24	ATDPHSIAERLRRERIAERIRALQELVPS	171	172	1.1e-22	VNKTDRAAMLDEIMDYVKFLRLQVKVLSM	200
Prupe.6G303500.1	458	5.76e-23	AAEVHNLSERRRRDRINEKMRALQELIPN	486	487	2.41e-23	CNKVDKASMLDEAIEYLKTLQLQVQIMSM	515
Prupe.5G200100.1	210	8.5e-22	AAAVHNQSERKRRDRINQKMKALQRLVPN	238	239	9.45e-22	ASKTDKASMLDEVIKYLEQLQAQVQMMSS	267
Prupe.2G136300.1	275	2.21e-21	AAAIHNQSERKRRDKINQRMKTLQKLVPN	303	343	2.26e-20	SQVTDKASMLDEVIEYLKNLQAQIQMISR	371
Prupe.8G209100.1	323	1.55e-21	AAEVHNLSERRRRDRINEKMKALQELIPR	351	352	1.09e-23	CNKSDKASMLDEAIEYLKSLQLQVQMMSM	380
Prupe.3G179800.1	348	4.05e-22	AAEVHNLSERRRRDRINEKMRALQELIPH	376	377	1.1e-22	SNKTDKASMLDEAIEYLKSLQMQLQVMWM	405
Prupe.1G432800.1	165	4.44e-21	AAEVHNMSEKRRRSRINEKMKALQNLIPN	193	194	3.15e-25	SNKTDKASMLDEAIEYLKQLQLQVQMLTM	222
Prupe.7G131400.1	221	4.44e-21	AAEVHNMSEKRRRSRINEKMKALQNLIPN	249	250	1.88e-26	SNKTDKASMLDEAIEYLKQLQLQVQMLSM	278
Prupe.5G210500.1	270	5.53e-19	PRSKHSATEQRRRSKINDRFQMLRELIPH	298	300	1.99e-18	DQKRDKASFLLEVIEYIQFLQEKVNKYEG	328
Prupe.3G248100.1	36	3.08e-19	NRSKHSETEQRRRSKINERFQMLRDLIPK	64	66	2.48e-18	DQKRDKASFLLEVIEYIQFLQEKVNLYEG	94
Prupe.6G198500.1	44	8.7e-18	AAKKHSDSERRRRMRINGQYATLRTVLPN	72	73	1.53e-14	LIKMDKASVLAETVRQVRELKRAVAEVEA	101
Prupe.1G530800.1	45	1.02e-19	ASKSHKEAERRRRQRINTHLSTLRTLLPN	73	74	7.61e-16	TTRTDKASLLAEVVQHVRELRRQAGDLAR	102
Prupe.2G252600.1	82	5.59e-18	ASKSHSQAEKRRRDRINAQLATLRKLIPK	110	111	3.86e-15	SDKMDKAALLGSVIDHVKDLKRKAMEVSK	139
Prupe.4G060000.1	74	1.28e-22	ALKNHSEAERRRRERINAHLSTLRGLVPC	102	103	2.39e-13	TEKMDKAALLATVISQVKELKKDALESSK	131
Prupe.7G031500.1	79	9.8e-19	ALKNHKEAEKRRRERINSHLDKLRGLLPC	107	108	2.24e-16	NSKTDKASLLAKVVQRVKELKQQTSELTE	136
Prupe.1G304900.1	163	1.22e-20	ASKSHSEAERRRRERINNHLAKLRSLLPS	191	192	1.52e-17	TTKTDKASLLAEVIQHVKELKRQTSLIAE	220
Prupe.2G009100.1	356	5.2e-22	ATHPRSIAERMRRTRISERMKKLQDLFPN	384	386	2.07e-17	DKQINTAEMLDLAVEFIKDLQKQVKTLGD	414
Prupe.6G022200.1	349	2.46e-24	ATHPRSIAERVRRTRISERMRKLQELVPN	377	379	4.21e-20	DKQTNTADMLDLAVEYIKDLQTQVQTLSD	407
Prupe.7G071500.1	273	2.46e-24	ATHPRSIAERVRRTRISERMRKLQELVPN	301	303	4.09e-19	DKQTNTADMLDLAVEYIKDLQKQFKTLSD	331
Prupe.1G554600.1	158	5.03e-23	ATHPRSIAERVRRTRISDRIRKLQDLVPN	186	188	1.98e-22	DKQTNTADMLDEAVEYVKFLQKQIQELSE	216
Prupe.1G181300.1	290	2.49e-21	ATHPRSIAERERRTRISGKLKKLQDLVPN	318	333	4.35e-16	VKQTSYADMLDLAVQHIKGLQNQVEDLHK	361
Prupe.4G048500.1	8	1.18e-12	SRADRKTIEKNRRNQMKALYSKLNSLVPH	36	40	6.03e-11	REVTSLPDQLDDAVNYIKKQQTNLEKMRE	68
Prupe.4G100400.1	163	7.51e-15	TLSAQSIAARERRRRITEKTQELGRLIPG	191	192	3.45e-17	ATKMNTAEMLQAAYKYVKFLQAQVSVLKL	220
Prupe.4G134200.1	187	1.15e-14	CVSAQSIAARERRRKITEKTQELGKLVPG	215	216	3.86e-15	GSKMNTAEMLTAAYNFVKYLRAQVGILEF	244
Prupe.3G159800.1	197	5.88e-22	TKDPQSIAAKNRRERISERLKILQELVPN	225	226	7.28e-18	GCKVDLVTMLEKAISYVKFLQLQVKVLAT	254
Prupe.8G143500.1	278	3.34e-24	ATDSQSIYARKRREKINERLRILQNLVPN	306	307	3.43e-18	GTKVDISTMLEEAVQYVKFLQLQIKLSSS	335
Prupe.8G143600.1	275	1.66e-22	AIDPQSLYARKRREKINERLRVLQNLVPN	303	304	1.99e-20	GTKVDISTMLEEAVHYVKFLQLQIKLLSS	332
Prupe.1G424100.1	261	4.5e-24	ATDPQSLYARKRRERINERLRILQNLVPN	289	290	1.99e-20	GTKVDISTMLEEAVHYVKFLQLQIKLLSS	318
Prupe.6G281600.1	44	2.49e-21	STDPQSVAARERRHRISDRFKILQSLVPG	72	73	4.77e-20	GTKMDTVSMLEEAIHYVKFLKAQIWLHQS	101
Prupe.3G054400.1	338	2.62e-20	SSDPQTVAARQRRERISERIRVLQRLVPG	366	367	6.89e-20	GGKMDTASMLDEAANYLKFLRSQVKALEN	395
Prupe.6G159200.1	147	4.46e-20	SDDPQSVAARHRRERISEKIRILQRLVPG	175	176	7.94e-24	GTKMDTASMLDEAIRYVKFLKRQIRLLQS	204
Prupe.1G434000.1	160	1.08e-21	SKDPQSVAARHRRERISERIRILQRLVPG	188	189	1.53e-25	GTKMDTASMLDEAIHYVKFLKSQIQTLER	217
Prupe.7G132300.1	170	5.58e-21	SKDPQSVAARHRRERISEKIRILQRLVPG	198	199	3.3e-28	GTKMDTASMLDEAIHYVKFLKKQVQTLER	227
Prupe.7G207500.1	374	5.21e-17	SQLHHMISERKRREKLNESFHTLKSLLPP	402	403	1.58e-15	GTKKDKASVLTTAREYLTSLRAQVAELSK	431
Prupe.4G030900.1	311	2.75e-12	ETPSPLPTFKVRKEKLGDRITALQQLVSP	339	340	1.54e-20	FGKTDTASVLHEAIEYIKFLHEQVSVLST	368
Prupe.4G196600.1	333	2.65e-13	ETSSPLPAFKVRKEKMGDRITALQQLVSP	361	362	2.15e-21	FGKTDTASVLSEAIEYIKFLHEQVNVLST	390
Prupe.1G524500.1	128	7.51e-20	QRMTHIVVERNRRKQMNEYLAVLRSLMPQ	156	159	1.44e-15	AQRGDQASIIGGAINFVKELEQLLQSMDS	187
Prupe.6G194400.1	120	6.08e-19	QRMTHIAVERNRRKQMNDYLAALRAMMPA	148	151	6.3e-17	AQRGDQASIIGGAINFVKELEQLLQSLEG	179
Prupe.6G329600.1	146	6.77e-20	QRMTHIAVERNRRKQMNEYLSVLRSLMPD	174	177	4.22e-17	VQRGDQASIIGGAINFVKELEQEVHFLGT	205
Prupe.5G033300.1	116	3.61e-20	QRMTHIAVERNRRKQMNEHLAILRSLMPD	144	147	3.28e-16	AQRGDQASIVGGAIEFVKELEHLLHSLEA	175
Prupe.2G198800.1	218	1.88e-18	QRMTHIAVERNRRRQMNDHLNVLRSLMPT	246	249	1.52e-17	IQRGDQASIVGGAIDFVKELEQLLQSLEA	277
Prupe.1G006600.1	217	1.38e-21	QRMTHIAVERNRRKQMNEHLRVLRSLMPG	245	248	5.16e-17	VQRGDQASIIGGAIEFVRELEQLLQCLES	276
Prupe.2G307300.1	120	1.54e-19	TRMSHITVERNRRKQMNDHLSVLRSLMPC	148	151	3.08e-18	VKRGDQASIIGGVVDYINELQQVLQSLEA	151
Prupe.1G151800.1	182	4.01e-20	HAQDHVLAERKRREKLSQRFIALSALVPG	210	30	1.11e-17	IKRGDQASIIGGVIEFIKELHQVLQSLES	58
Prupe.2G097200.1	282	1.18e-16	KGTKHFATEKHRRVQLNGKYSALRDLVPN	310	311	1.12e-19	PTKTDRASIVGDAIDYIKELLRTVDELKL	339
Prupe.7G040300.1	43	5.59e-18	KKLNHNASERDDRKKINTLYSTLRSLLPA	71	75	1.5e-13	MKKLSNPAAISRAVKYIPELQQQVKGLIQ	103
Prupe.7G040500.1	44	2.07e-19	KKLNHNASERERRKKINTLYSTLRSLFPA	72
Prupe.7G040100.1	74	2.98e-18	KKLNHNASERDRRQKINSLYSSLRSLLPA	102	105	2.98e-14	MKKLSIPNTISRVVKYIPELQKQVEGLIR	133
Prupe.7G039900.1	71	1.13e-17	KKLNHNASERDRRKKINSLYSSMRSLLPA	99	102	4.5e-14	AKKLSIPDTISRVLKYIPELQKQVEGLIR	130
Prupe.7G039800.1	71	2.98e-18	KKLNHNASERDRRKKMNSLYSSLRSLLPV	99	102	4.77e-13	GKKLSIPNTISHVLKYIPELQKLVEGLIR	130
Prupe.1G213700.1	71	2.98e-18	KKLNHNASERDRRKKMNSLYSSLRSLLPV	99
Prupe.1G030500.1	79	1.34e-12	RGFRHMLNERMRREKQKQSYMALHSMLPT	107	108	2.75e-10	GAKSDKNWIVQMTAMNIQQLQRYKEELRK	136
Prupe.8G127700.1	106	5.25e-15	DHEMHIWTERERRKKMRNMFANLHALLPQ	134	136	9.35e-17	PPKADKSTIVDEAVNYIKTLQQTLQKLQK	164
Prupe.1G432900.1	67	5.64e-15	EHGMHTWTERERRKKMRDMFSSLHALLPQ	95	97	2.39e-13	PAKADKSTIVDESVRYIKSLEKTLQTKQK	125
Prupe.6G210200.1	188	1.09e-20	QPSKNLMAERRRRKRLNDRLSMLRSIVPK	216	217	3.83e-18	ISKMDRTSILGDTIDYMKELLERINKLQE	245
Prupe.1G540400.1	183	1.09e-20	QPSKNLMAERRRRKRLNDRLSMLRSIVPK	211	212	2.81e-17	ISKMDRTSILGDTIDYMKELLERINNLQQ	240
Prupe.5G143200.1	341	2.49e-21	LPAKNLMAERRRRKKLNDRLYMLRSVVPK	369	370	7.11e-21	ISKMDRASILGDAIEYLKELLQKINNLHN	398
Prupe.3G312800.1	349	2.49e-21	LPAKNLMAERRRRKKLNDRLYMLRSVVPK	377	378	1.99e-20	ISKMDRASILGDAIDYLKELLQRINDLHN	406
Prupe.1G074400.1	48	7.51e-20	MASKNIVSERNRRKKLNERLFALRAVVPK	76	77	6.54e-18	ISKMDKASIIKDAIDYIQELHEQERRIQT	105
Prupe.6G112600.1	84	1.72e-18	DRSRTLVSERRRRGRMKERLYALRSLVPN	112	113	7.11e-21	ITKMDKASIVGDAVLYVQDLQKQAKKLKA	141
Prupe.4G030600.1	34	4.13e-19	YKSKNLHAERRRRQKLSERLLTLRALVPN	62	63	5.7e-17	ITNMNKATIVEDAITYIHELQKTVNILKD	91
Prupe.1G252600.1	293	2.06e-16	YQSKNLFAERNRRSRIKDGHFALRALVPK	321	322	9.23e-21	ISKMDIPAIIGDAVEYIEELKKKVKELED	350
Prupe.8G166900.1	388	2.49e-21	PQAKNLVAERKRRKKLNERLFALRALVPN	416	417	6.21e-22	ISKLDRASILGDAIEYVQELQKQAKQLQD	445
Prupe.8G166800.1	348	2.49e-21	PQSKNLFAERKRRKKLNDRLYCLRSLVPN	376	377	1.1e-22	ISKMDKAAILGDAIDFVKDLLRQVKELQD	405
Prupe.6G212000.1	182	4.01e-20	HAQDHVLAERKRREKLSQRFIALSALVPG	210	211	5.4e-22	LKKMDKASVLGDAIKYVKHLQERTKMLEE	239
Prupe.6G211900.1	183	1.39e-19	HAQEHIMAERKRREKLSERFIALSAIVPG	211	212	1.27e-22	LKKMDKASVLGDAIKHVKQLQERVKVLEE	240
Prupe.8G157500.1	164	3.61e-20	TTQDHIIAERKRREKLSQRFIALSAMVPG	192	193	4.88e-24	LKKMDKASVLGDAIKYIKQLQDKVKTLEE	221
Prupe.8G242100.1	401	1.12e-22	LSANHVMAERRRREKLNERFIILRSLVPF	429	430	4.14e-24	VTKMDKASILGDTIEYVKQLRKKIQDLEA	458
Prupe.5G100700.1	439	1.72e-18	IGMNHALSERRRREKLNERFCVLKSMVPS	467	468	1.54e-20	ISKDDKVSILDDAIEYLKDLEKRVEELES	496
Prupe.8G228700.1	350	3.69e-25	EPLNHVEAERQRREKLNQRFYALRAVVPN	378	379	4.21e-20	ISKMDKASLLGDAITYITDLQMKIRVMET	407
Prupe.2G190100.1	470	3.69e-25	EPLNHVEAERQRREKLNQRFYALRAVVPN	498	499	6.04e-23	ISKMDKASLLGDAIAYINELQAKLKMMEA	527
Prupe.5G035400.1	508	3.69e-25	EPLNHVEAERQRREKLNQRFYALRAVVPN	536	537	1.54e-20	VSKMDKASLLGDAISYINELKAKLQTTES	565
Prupe.2G195300.1	318	1.35e-25	TPLNHVEAERQRREKLNHRFYALRAVVPN	346	347	8.78e-20	VSRMDKASLLSDAVSYINELKTKVDELES	375	147	1.93e-44	VPGKAFSSGSVVWLTGSHELQFYNCDRAKEAQMHGFQTLVCIPTPTGVLE	196
Prupe.5G087900.1	302	2.76e-26	ALLNHVEAERQRREKLNHRFYVLRSVVPN	330	331	1.88e-21	VSKMDKSSLLADAVSYINQLKAKVEELEA	359	142	6.98e-65	ILGRAFCSGGFVWLAGVHELQFYECERVKEARMHGIQTLVCIATSCGVLE	191
Prupe.5G087600.1	307	2.87e-24	SLLNHVEAERQRREKLNHRFYLLRSVVPN	335	336	3.72e-20	VSKMDRSSLLADAVAYINQLKAKVEELEL	364	142	5.36e-67	ILGRAFCSGGFVWLAGAHELQFYECERVKEARMHGIQTLVCIATPCGVLE	191
Prupe.5G130600.1	304	1.35e-25	QLLNHVEAERQRREKLNHRFYVLRSVVPN	332	333	1.26e-19	VSKMDRSSLLADAASYINQLKAKVEELEA	361	143	3.06e-66	VLGRAFCSGGFVWLAGAHELQFYECERVKEARMHGIQTLVCIATPCGVLE	192
Prupe.5G130700.1	300	2.46e-24	SPINHVEAERQRREKLNHRFYALRSVVPN	328	329	8.1e-21	VSKMDKASLLSDAVVYINKLKAKVEELEA	357	138	3.08e-64	ILGRAFCSGGFVWLAGDHELQFYECERVKEARMHGIQTLVCIQTSCGVLE	187
Prupe.5G130500.1	307	7.01e-24	ESSTHVEAERQRREKLNHRFYVLRSVVPN	335	336	7.11e-21	VSKMDRSSLLADAVAYINQLKEKVEELEA	364	149	3.6e-64	ILDRAFCSGGFVWLAGDHELQFYECERVKEARMHGIQTLVCVATPCGVLE	198
Prupe.5G130300.1	293	5.66e-26	QLLNHVEAERQRREKLNHRFYALRSVVPN	321	322	1.12e-19	VSKMDRSSLLADAVAYINQLKAKTEELED	350	141	8.92e-62	ILGRSFCSGGFVWLAGDHELQFYECERVKKARMHGIQSLVCIATPCGVLE	190
Prupe.5G130400.1	308	1.35e-25	QLLNHVEAERQRREKLNHRFYVLRSVVPN	336	337	4.77e-20	VSKMDRSSLLADAVAYINQLKSKVEELEA	365	148	5.36e-67	ILGRAFCSGGFVWLAGAHELQFYECERVKEARMHGIQTLVCIATPCGVLE	197
